# Supplementary material for: Seven phenoxido-bridged complexes encapsulated by 8-hydroxyquinoline Schiff base derivatives and β-diketone ligands: single-molecule magnet, magnetic refrigeration and luminescence properties
Source: Royal Society of Chemistry journal article supplement (doi:10.1039/c5dt04391c), 2016-01-01
Supplement: c5dt04391c1.pdf [file c5dt04391c1.pdf]

*Electronic supplementary information*

**Seven phenoxido-bridged complexes encapsulated by 8-hydroxy-quinoline Schiff base derivatives and  $\beta$ -diketone ligands: single-molecule magnet, magnetic refrigeration and luminescence properties**

Shi-Yu Wang, Wen-Min Wang, Hong-Xia Zhang, Hai-Yun Shen, Li Jiang, Jian-Zhong Cui\* and

Hong-Ling Gao\*

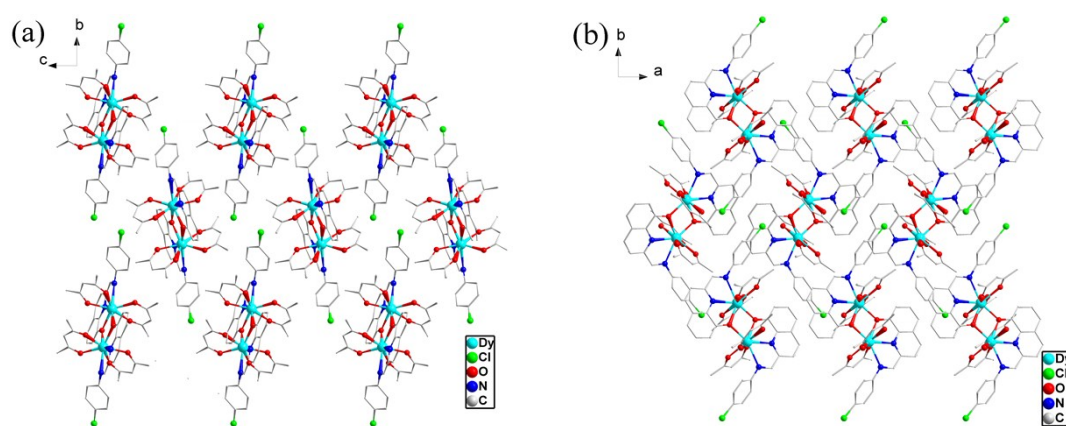

**Figure S1.** Packing arrangement of complex **4** viewed along the crystallographic *a* axis (a) and *c* axis (b).

\* Department of Chemistry, Tianjin University, Tianjin 300072, P. R. China. E-mail: [cuijianzhong@tju.edu.cn](mailto:cuijianzhong@tju.edu.cn)

\* Department of Chemistry, Tianjin University, Tianjin 300072, P. R. China. E-mail: [ghl@tju.edu.cn](mailto:ghl@tju.edu.cn)

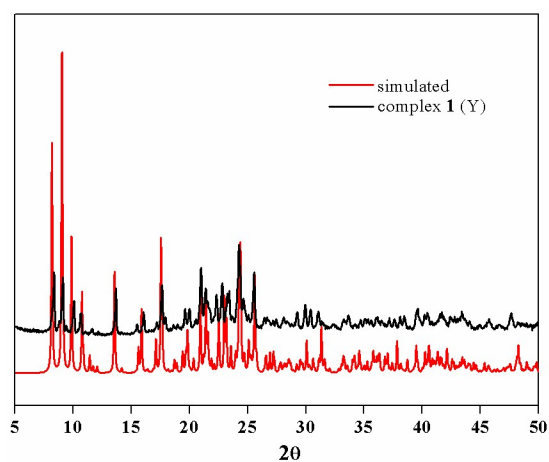

**Figure S2.** Simulated and experimental PXRD patterns of complex **1**.

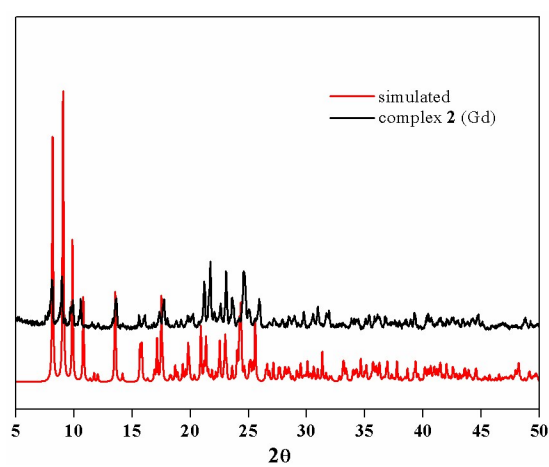

**Figure S3.** Simulated and experimental PXRD patterns of complex **2**.

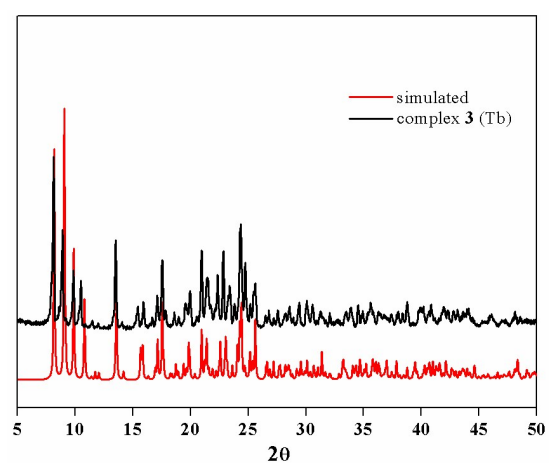

**Figure S4.** Simulated and experimental PXRD patterns of complex **3**.

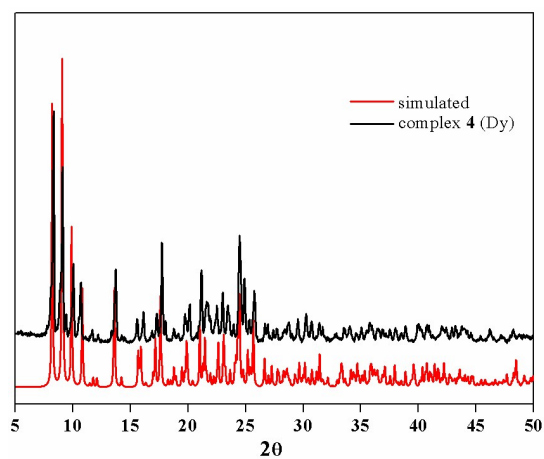

**Figure S5.** Simulated and experimental PXRD patterns of complex 4.

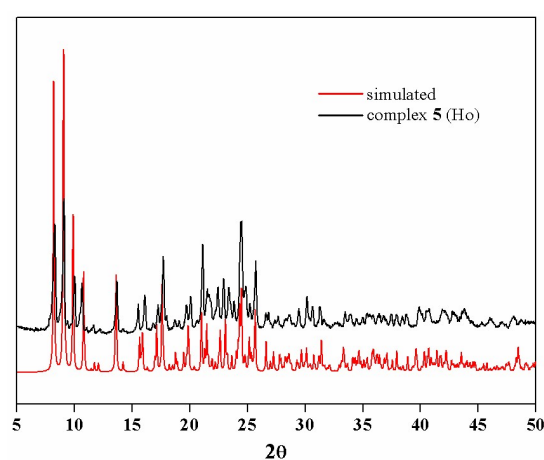

**Figure S6.** Simulated and experimental PXRD patterns of complex 5.

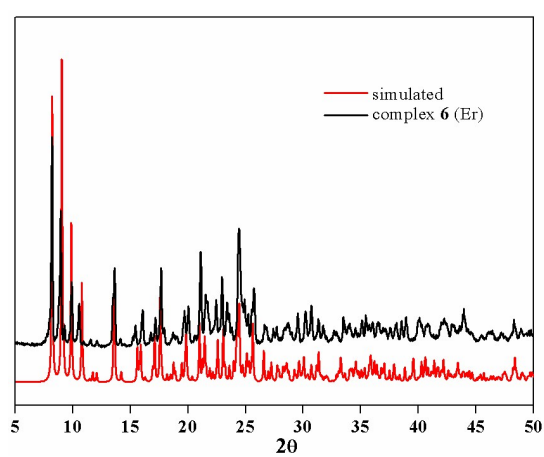

**Figure S7.** Simulated and experimental PXRD patterns of complex 6.

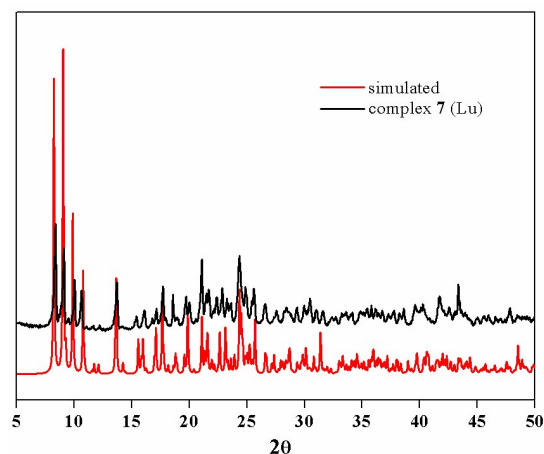

**Figure S8.** Simulated and experimental PXRD patterns of complex 7.

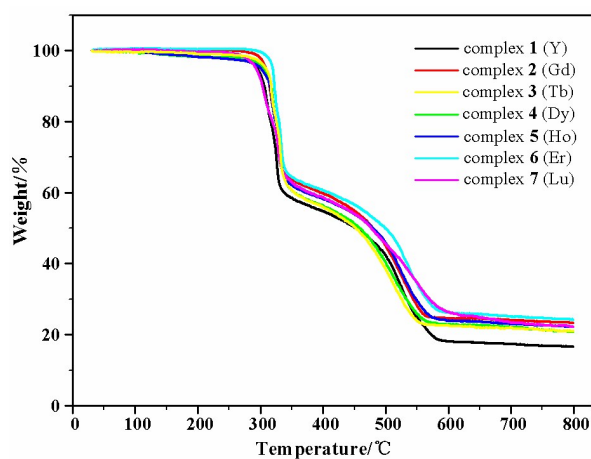

**Figure S9.** TGA curves for 1–7.

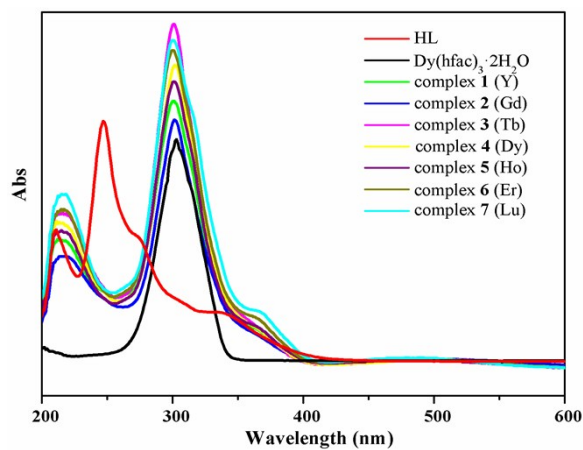

**Figure S10.** The UV-vis spectra of HL,  $\text{Dy}(\text{hfac})_3 \cdot 2\text{H}_2\text{O}$  and complexes 1–7

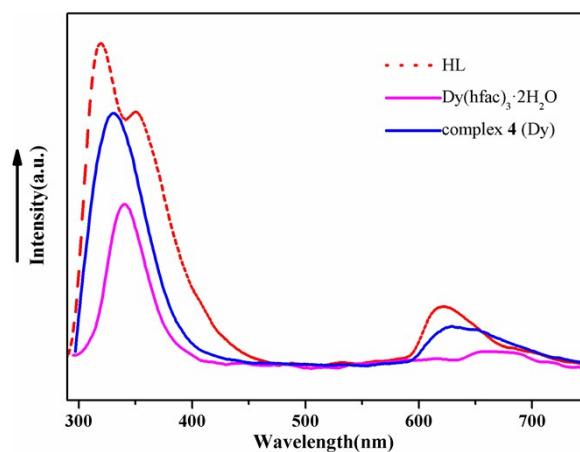

**Figure S11.** The emission spectra of HL, Dy(hfac)<sub>3</sub>·2H<sub>2</sub>O and complex **4**.

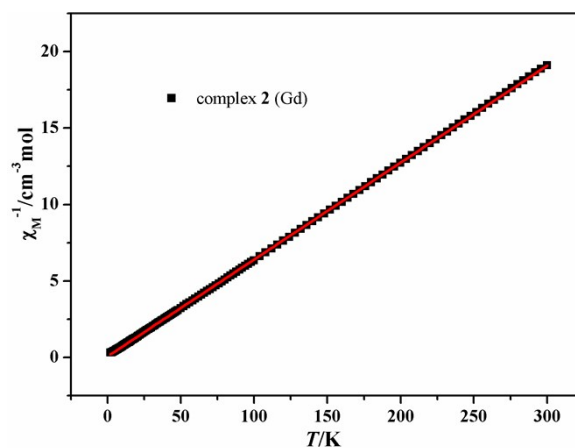

**Figure S12.** Temperature dependence of the magnetic susceptibility in the form of  $\chi_M^{-1}$  vs  $T$  for **2**

[(■) experimental data; (—) best-fit curve].

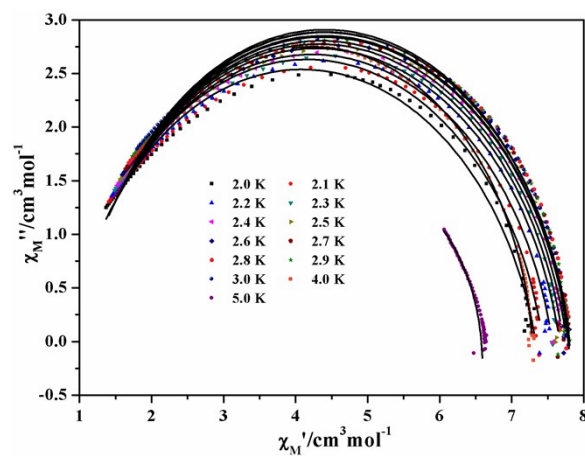

**Figure S13.** Cole–Cole plots for **4** measured in zero-dc field. The solid lines are the best fit to the experimental data, obtained with the generalized Debye model with  $\alpha = 0.068$ – $0.156$  for **4**
